# Supplementary material
Source: PubMed Central journal article supplement (PMC314163)

Post-Klenow Extension  
Pre-Bisulfite Conversion

Post-Bisulfite Conversion

Unmethylated  
Oligo

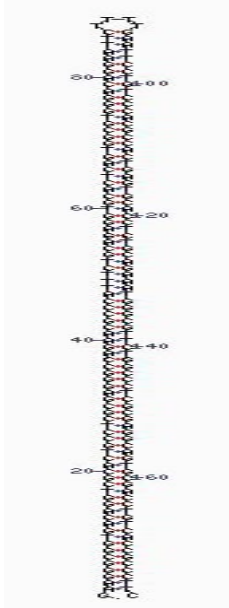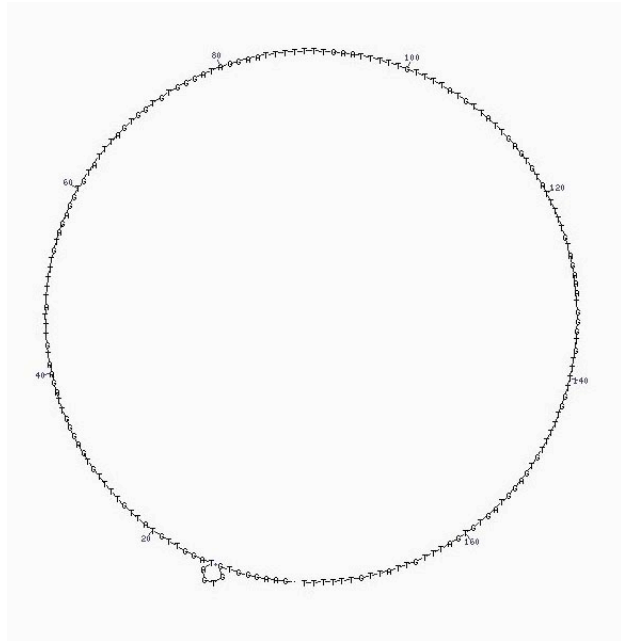

Methylated  
Oligo

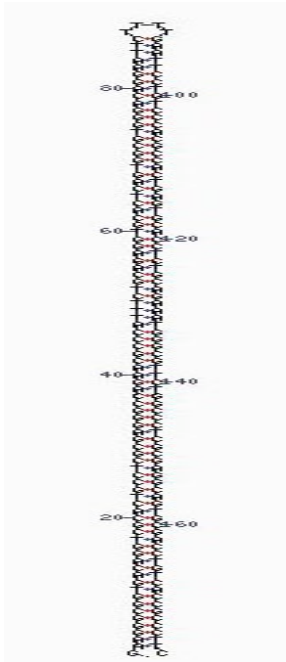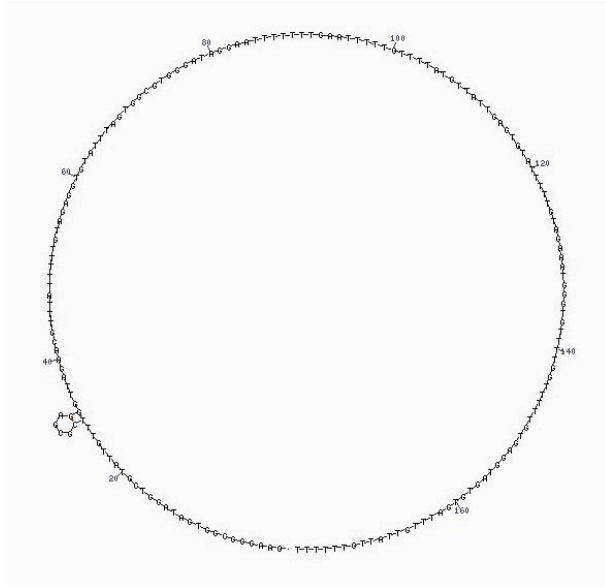

Supplement: pnas_101_1_204__2.pdf [file pnas_101_1_204__2.pdf]
