# Supplementary material
Source: PubMed Central journal article supplement (PMC314163)
Supplement: pnas_101_1_204__6.pdf [file pnas_101_1_204__6.pdf]

## I. Genomic double stranded DNA (portion of the CpG island of *FMRI*)

5' ... CGGATGCATTTGATTTCCCA **CGCCACTGAGTG** CACCTCTGCAGAAATGGGCGTTCTGGCCCTCGCGAGGCAGTGGACCTGTCCACCGCCCTTCAGCCTTCCCGCCCTCCACCAAGCCCGGCAC...3'  
 3' ... GCCTACGTAAACTAAAGGGT **GCGTGACTCAC** GTGGAGACGTCTTTACCCTGCAAGACCCGGGAGCGCTCCGTACCGCTGGACAGTGGGGGAAGTCGGAAGGCGGGAGGTGGTTCGGCGCGTG...5'

## II. Restriction digest

+ **DraIII restriction enzyme and incubation** (recognition sequence in yellow)

OH P  
 5' ... TGCATTCGATTCACCA **GTGC** CACCTCTGCAGAAATGGGCGTTCTGGCCCTCGCGAGGCAGTGGACCTGTCCACCGCCCTTCAGCCTTCCCGCCCTCCACCAAGCCCGGCAC...3'  
 3' ... ACGTAAACTAAAGGGT **ACTCAC** GTGGAGACGTCTTTACCCTGCAAGACCCGGGAGCGCTCCGTACCGCTGGACAGTGGGGGAAGTCGGAAGGCGGGAGGTGGTTCGGCGCGTG...5'  
 P OH

## III. Addition and ligation of hairpin linker

GA OH  
 C GCATCGCTTGA -3'  
 T GCTAGCGA -5'  
 TC P

OH P  
 5' **GTG** CACCTCTGCAGAAATGGGCGTTCTGGCCCTCGCGAGGCAGTGGACCTGTCCACCGCCCTTCAGCCTTCCCGCCCTCCACCAAGCCCGGCAC...3'  
 3' - **ACTCAC** GTGGAGACGTCTTTACCCTGCAAGACCCGGGAGCGCTCCGTACCGCTGGACAGTGGGGGAAGTCGGAAGGCGGGAGGTGGTTCGGCGCGTG...5'  
 OH

+ **T4 DNA ligase and incubation**

GA  
 C GCATCGCTTGA **GTG** CACCTCTGCAGAAATGGGCGTTCTGGCCCTCGCGAGGCAGTGGACCTGTCCACCGCCCTTCAGCCTTCCCGCCCTCCACCAAGCCCGGCAC...3'  
 T GCTAGCGA **ACTCAC** GTGGAGACGTCTTTACCCTGCAAGACCCGGGAGCGCTCCGTACCGCTGGACAGTGGGGGAAGTCGGAAGGCGGGAGGTGGTTCGGCGCGTG...5'  
 TC

## IV. Sodium bisulfite conversion of cytosine (but not methyl-cytosine) to **uracil**

AGUATUGUTTGA **GTGU** AUU T T C AGAAATGGGCGTTTGGUUU **CGCG** AGG U AGTGC GAU UGTUAU **CGUUU** TTUAGUUTT **UCGUUUU** TUAUUAAGUU **CGCGUAU** ...3'  
 G  
 (loss of significant base-pair complementarity due to bisulfite conversion)  
 T  
 T  
 UCU **TAGCGA** AUUUAU **GTGGAGAU** GTU TTTA **UUUGCA** AAGAU **GGGACGGC** TUU GTUAU **UGCT** TGGAU **AGTGG** GGGAAAGTUGGAAGGCGGGAGGTGGTTGG **CGCG** GTG...5'

## V. Right primer anneals during 1<sup>st</sup> round of PCR amplification

5' to 3' extension by polymerase Right Primer (example)  
 <-- <-- **RCAAAAATAATTCAARCRATA**-5'

AGUATUGUTTGA **GTGU** AUU T T C AGAAATGGGCGTTTGGUUU **CGCG** AGG U AGTGC GAU UGTUAU **CGUUU** TTUAGUUTT **UCGUUUU** TUAUUAAGUU **CGCGUAU** ...3'  
 G  
 T  
 T  
 UCU **TAGCGA** AUUUAU **GTGGAGAU** GTU TTTA **UUUGCA** AAGAU **GGGACGGC** TUU GTUAU **UGCT** TGGAU **AGTGG** GGGAAAGTUGGAAGGCGGGAGGTGGTTGG **CGCG** GTG...5'

## VI. Right primer extends to make complementary copy of top and bottom strands

TCATAACAAACTCATAAAAAACATCTTTACCCTGCAAAACCAAAA **CGCTCCATCACGCTAAACAATAGCAAAAAATCAAAAAARCAAAAAATAATTCAARCRATA** -5'  
 C AGUATUGUTTGA **GTGU** AUU T T C AGAAATGGGCGTTTGGUUU **CGCG** AGG U AGTGC GAU UGTUAU **CGUUU** TTUAGUUTT **UCGUUUU** TUAUUAAGUU **CGCGUAU** ...3'  
 A  
 A  
 T  
 A  
 UCU **TAGCGA** AUUUAU **GTGGAGAU** GTU TTTA **UUUGCA** AAGAU **GGGACGGC** TUU GTUAU **UGCT** TGGAU **AGTGG** GGGAAAGTUGGAAGGCGGGAGGTGGTTGG **CGCG** GTG...5'  
 ACAATCACTTAAATACACCTCTACAAAAATAAACGTTCTAACCTTC **CGCA** AACAATA **CGACCTATCACCGCCCTTCAACCTTCCCGCCCTCCACCAAAACCGGCAC**...3'

## VII. Left primer anneals during 2<sup>nd</sup> round of PCR amplification

TCATAACAAACTCATAAAAAACATCTTTACCCTGCAAAACCAAAA **CGCTCCATCACGCTAAACAATAGCAAAAAATCAAAAAARCAAAAAATAATTCAARCRATA** -5'  
 C  
 A  
 A  
 A

ACAATCACTTAAATACACCTCTACAAAAATAAACGTTCTAACCTTC **CGCA** AACAATA **CGACCTATCACCGCCCTTCAACCTTCCCGCCCTCCACCAAAACCGGCAC**...3'  
 <-- <-- **GGAGGTGGTTGGGYGYGTG**-5'  
 Left Primer (example)

## VIII. Left primer extends

AGTATTGTTGAGTGATTTTTGTAGAAATGGGCGTTTGGTTTT **CGCG** AGGTACTGCGATTGTTATCGTTTTTTAGTTTTTTCTGTTTTTTATTAAGTTCGCGTAT-3'  
 G TCATAACAAACTCATAAAAAACATCTTTACCCTGCAAAACCAAAA **CGCTCCATCACGCTAAACAATAGCAAAAAATCAAAAAARCAAAAAATAATTCAARCRATA** -5'  
 C  
 TA  
 TA  
 A  
 T  
 ACAATCACTTAAATACACCTCTACAAAAATAAACGTTCTAACCTTC **CGCA** AACAATA **CGACCTATCACCGCCCTTCAACCTTCCCGCCCTCCACCAAAACCGGCAC**...3'  
 TGTAGTGAATTTATGTGGAGATGTTTTATTTGCAAGATTGGGAGCGCTTTGTTATCGTGGATAGTGGGGGAAGTGGGAAGGCG **GGAGGTGGTTGGGYGYGTG**-5'

PCR now proceeds in the conventional fashion
