# Supplementary material
Source: PubMed Central journal article supplement (PMC314163)

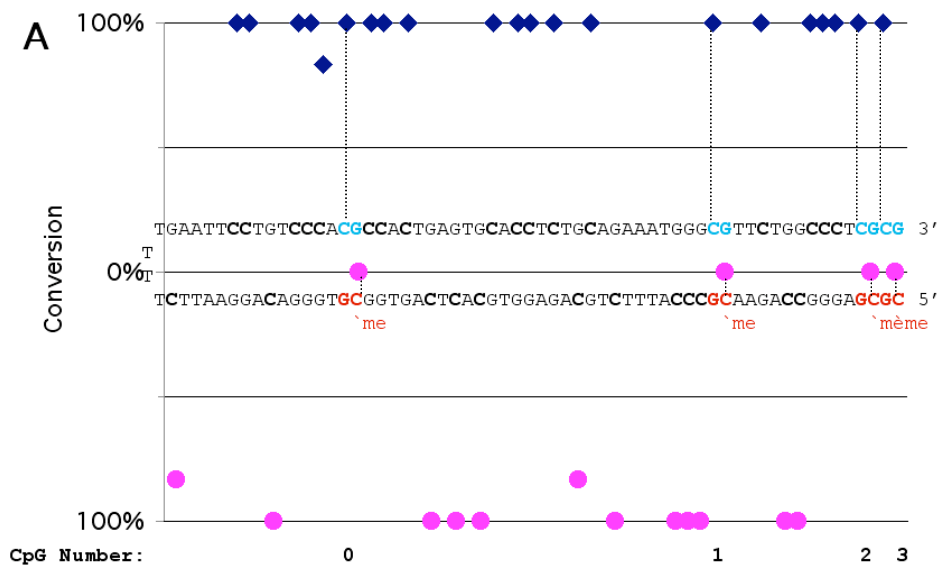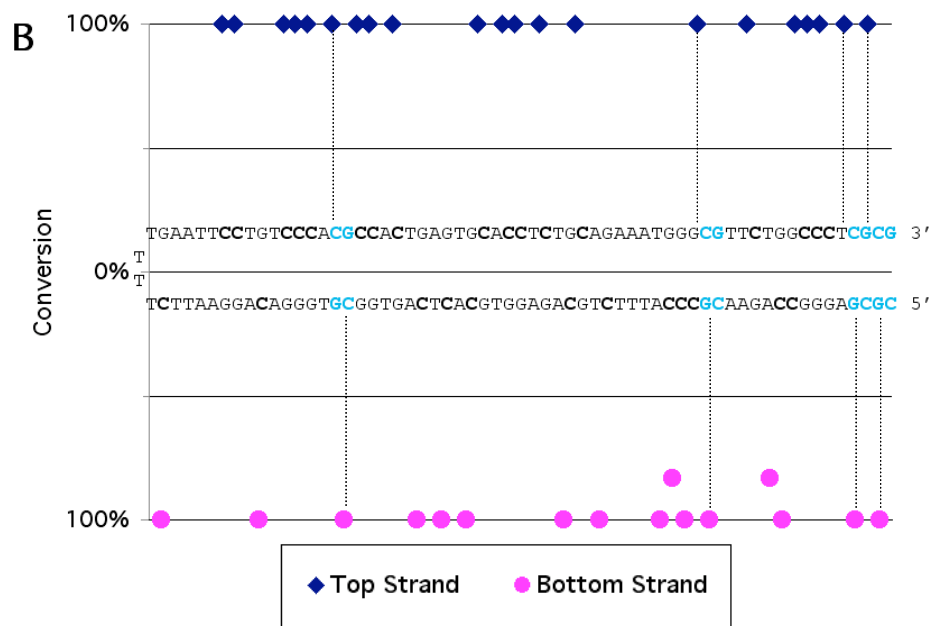

Supplement: pnas_101_1_204__4.pdf [file pnas_101_1_204__4.pdf]
